# Supplementary material for: Legal Recognition of Same-Sex Couples and Family Formation
Source: Springer Nature journal article supplement (doi:10.1007/s13524-014-0361-2), 2015-01-08
Supplement: MOESM1 [file 13524_2014_361_MOESM1_ESM.pdf]

## **Online Resource 1**

### **Legal recognition of same-sex couples and family formation**

**Mircea Trandafir**

Table S1: Data sources

| Country        | Year<br>RP  | Year<br>SSM | Marriage rate | Divorce rate  | Extramarital<br>birth rate | Age at first<br>marriage |
|----------------|-------------|-------------|---------------|---------------|----------------------------|--------------------------|
| Australia      | —           | —           | ABS           | ABS           | UN, ABS                    | ABS                      |
| Austria        | 2010        | —           | Eurostat      | Eurostat      | Eurostat                   | Eurostat                 |
| Belgium        | 2000        | 2003        | SB            | Eurostat      | Eurostat, SB               | Eurostat                 |
| Canada         | —           | 2005        | HRSDC         | StatCan       | StatCan                    | HRSDC                    |
| Czech Republic | <i>2006</i> | —           | Eurostat      | Eurostat      | Eurostat                   | Eurostat                 |
| Denmark        | 1989        | —           | Eurostat      | Eurostat      | Eurostat                   | —                        |
| Finland        | 2002        | —           | Eurostat      | Eurostat      | Eurostat                   | —                        |
| France         | <i>1999</i> | —           | Eurostat      | Eurostat, INS | Eurostat, INS              | —                        |
| Germany        | <i>2001</i> | —           | Eurostat      | Eurostat      | Eurostat                   | —                        |
| Greece         | —           | —           | Eurostat      | Eurostat      | Eurostat                   | Eurostat                 |
| Hungary        | 2009        | —           | Eurostat      | Eurostat      | Eurostat                   | Eurostat                 |
| Iceland        | 1996        | 2010        | Eurostat      | Eurostat      | Eurostat                   | —                        |
| Ireland        | 2011        | —           | Eurostat, CSO | Eurostat      | Eurostat                   | Eurostat                 |
| Italy          | —           | —           | Eurostat      | Eurostat      | Eurostat                   | Eurostat                 |
| Japan          | —           | —           | MH, JS        | JSB           | UN, MH                     | MH                       |
| Korea          | —           | —           | KNS           | KNS           | KNS                        | KNS                      |
| Luxembourg     | <i>2004</i> | —           | Eurostat      | Eurostat      | Eurostat                   | —                        |
| Netherlands    | 1998        | 2001        | CBS           | Eurostat      | Eurostat                   | Eurostat                 |
| New Zealand    | 2005        | —           | SNZ           | SNZ           | SNZ                        | SNZ                      |
| Norway         | 1993        | 2009        | Eurostat      | Eurostat      | Eurostat                   | —                        |
| Poland         | —           | —           | Eurostat      | Eurostat      | Eurostat                   | Eurostat                 |
| Portugal       | —           | 2010        | Eurostat      | Eurostat, SP  | Eurostat                   | Eurostat                 |
| Spain          | —           | 2005        | Eurostat      | Eurostat      | Eurostat                   | Eurostat                 |
| Sweden         | 1995        | 2009        | Eurostat      | Eurostat      | Eurostat                   | —                        |
| Switzerland    | 2007        | —           | Eurostat      | Eurostat      | Eurostat                   | Eurostat                 |
| Turkey         | —           | —           | TSI           | TSI           | ---                        | Eurostat                 |
| United Kingdom | 2005        | —           | Eurostat, ONS | Eurostat      | Eurostat                   | ONS                      |
| United States  | —           | —           | SA, VS        | VS, HS        | CDC                        | CPS                      |

Notes: Italics denote “weak RP” laws. Acronyms represent: ABS = Australian Bureau of Statistics, CBS = Statistics Netherlands, CDC = Center for Disease Prevention and Control (US), CPS = US Census Bureau estimates from the Current Population Survey, HRSDC = Human Resources and Skills Development Canada, HS = Historical Statistics of the United States, CSO = Irish Central Statistics Office, INS = National Institute of Statistics and Economic Studies of France, JS = Japan Statistical Yearbook, JSB = Statistics Bureau Japan, KNS = Korea National Statistical Office, MH = Ministry of Health, Labour and Welfare of Japan, ONS = UK Office for National Statistics, SA = Statistical Abstract of the US, SB = StatBel, SNZ = Statistics New Zealand, SP = Statistics Portugal, TSI = Statistical Indicators 1923-2009 of Turkey, UN = UN Demographic Yearbook, VS = Vital Statistics of the US (provided by CDC).

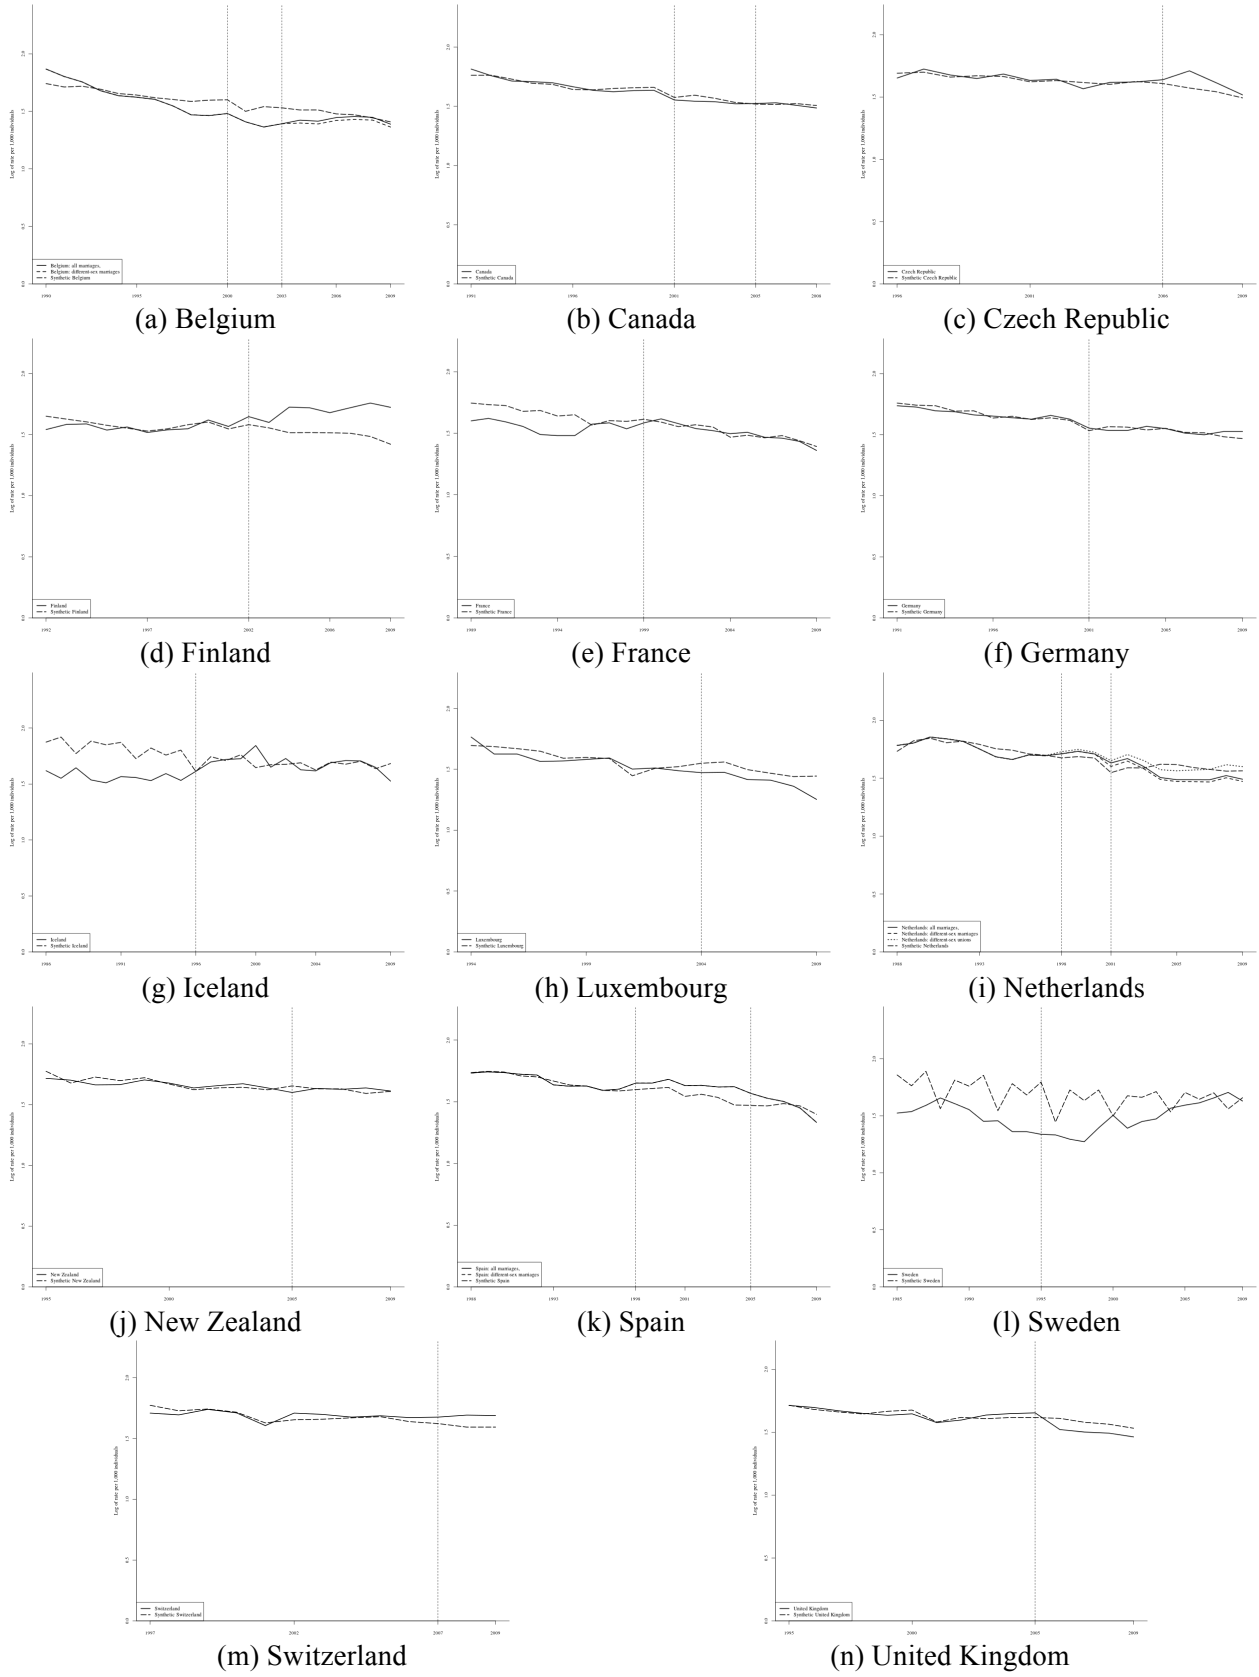

(m) Switzerland  
 (n) United Kingdom  
 Figure S1: Evolution of actual and synthetic different-sex marriage rate

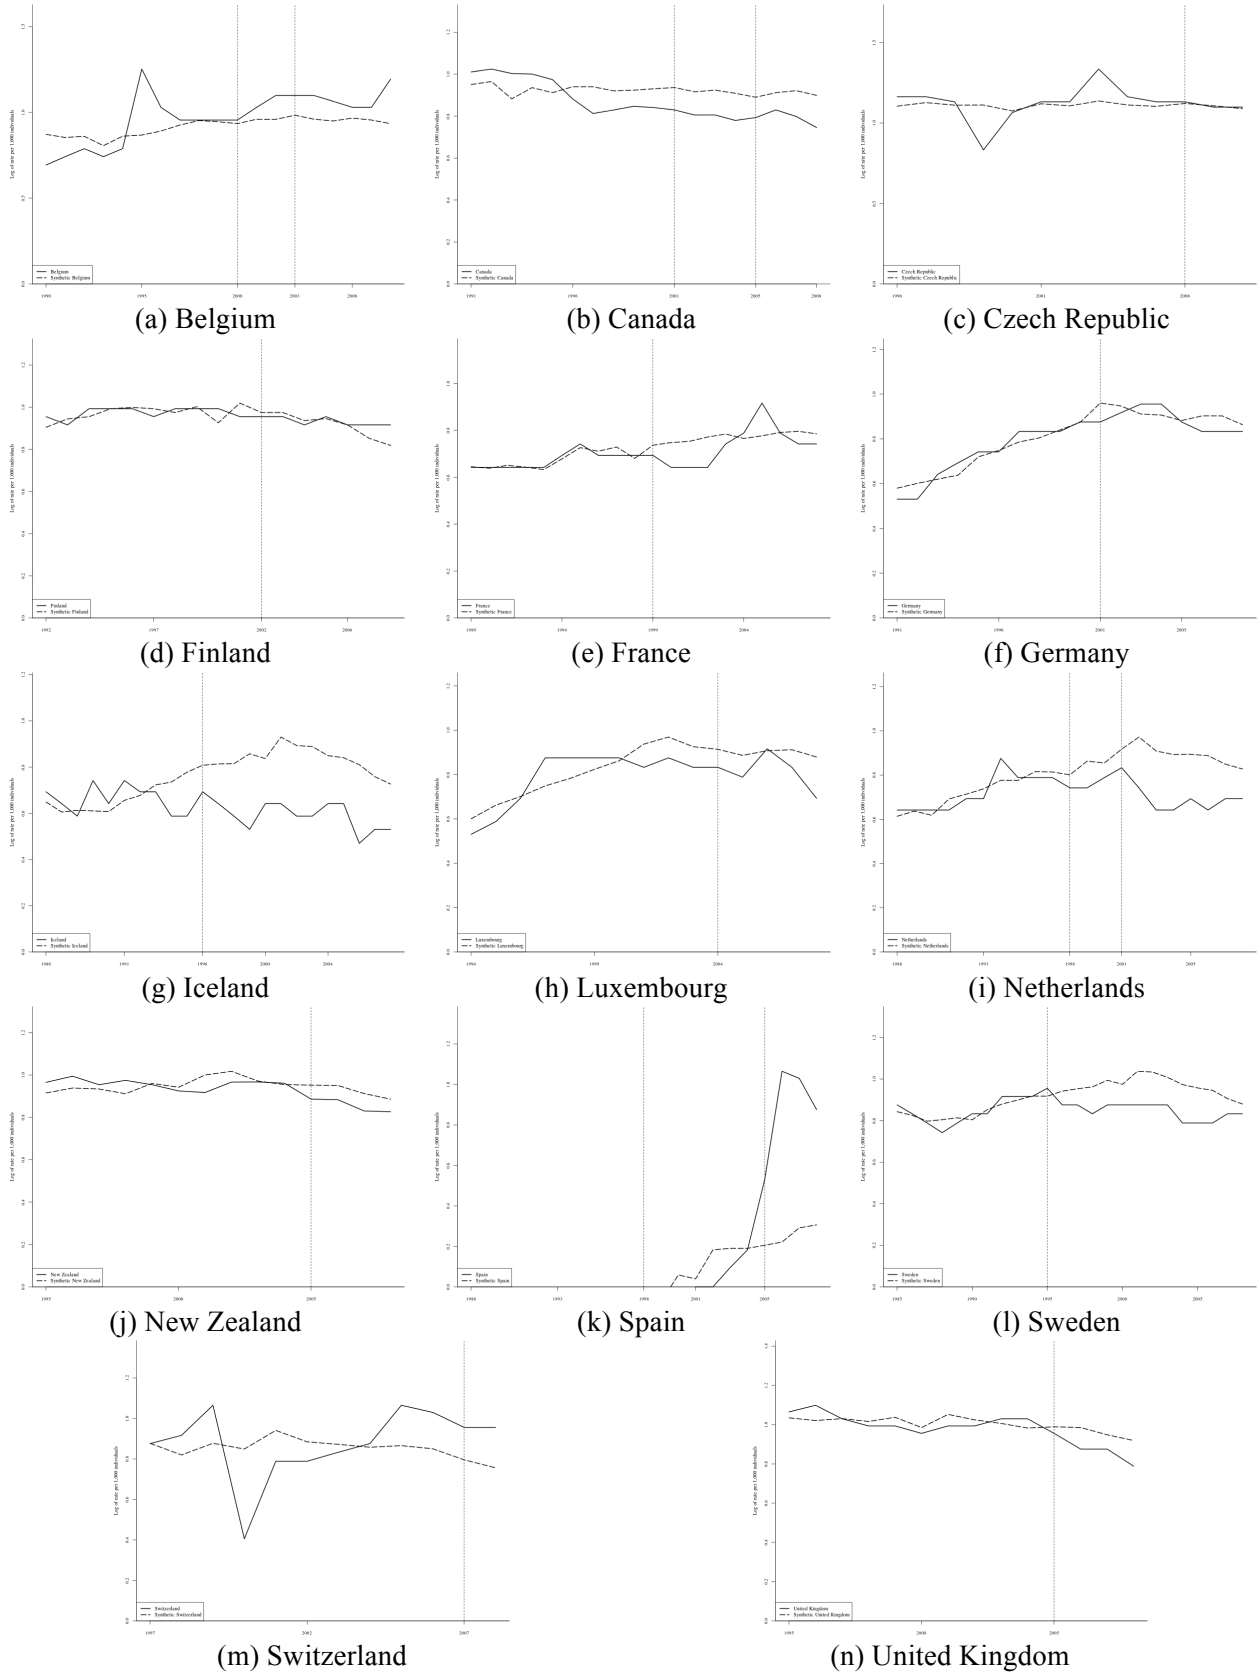

(m) Switzerland  
 (n) United Kingdom  
 Figure S2: Evolution of actual and synthetic divorce rate

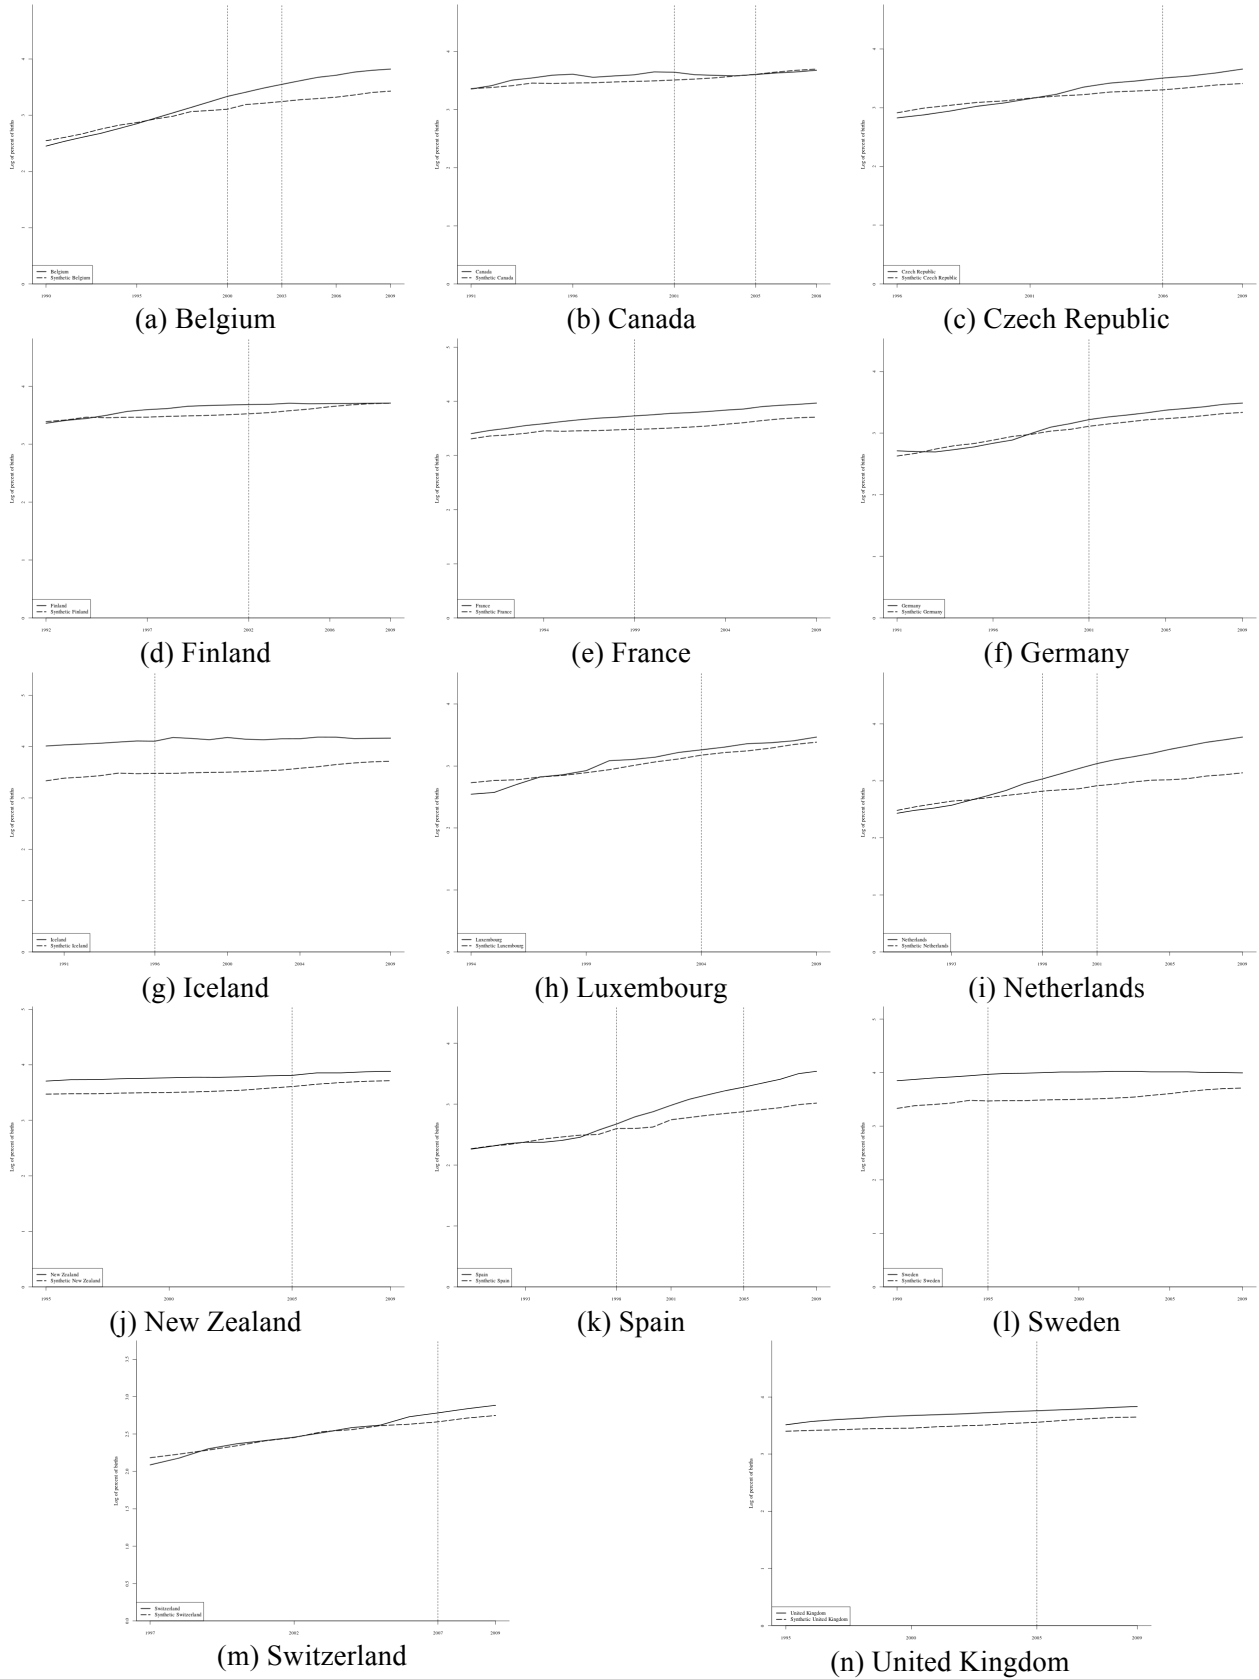

Figure S3: Evolution of actual and synthetic extramarital birth rate
